# Supplementary material for: Subpopulation-specific machine learning prognosis for underrepresented patients with double prioritized bias correction
Source: PubMed Central journal article supplement (PMC9436942; doi:10.1038/s43856-022-00165-w), 2022-09-01
Supplement: 43856_2022_165_MOESM3_ESM.pdf [file 43856_2022_165_MOESM3_ESM.pdf]

## **Description of Additional Supplementary Files**

**File Name:** Supplementary Data 1

**Description:** All source data for main figures
